# Supplementary material for: Metabolomics Strategy Using High Resolution Mass Spectrometry Reveals Novel Biomarkers and Pain-Relief Effect of Traditional Chinese Medicine Prescription Wu-Zhu-Yu Decoction Acting on Headache Modelling Rats
Source: MDPI journal article supplement (doi:10.3390/molecules22122110), 2017-12-18
Supplement: s1 [file s1]

## Analytical method validation

The instrumental precision, sample repeatability and within-day stability were determined prior to the analysis of experimental samples. Quality control (QC) samples were obtained by mixing an equal amount (100  $\mu$ l of brain homogenates or 10  $\mu$ l of plasma) from each sample. The extracted ion chromatographic peaks of six ions ( $m/z$  132.0762\_0.94 min,  $m/z$  137.0447\_1.28 min,  $m/z$  205.0979\_6.70 min,  $m/z$  161.0946\_9.30 min,  $m/z$  327.0093\_12.53 min,  $m/z$  526.2928\_13.67 min) from brain samples and six ions ( $m/z$  112.0498\_1.13 min,  $m/z$  205.0961\_6.65 min,  $m/z$  531.7684\_7.73 min,  $m/z$  318.2992\_11.41 min,  $m/z$  496.3388\_14.52 min,  $m/z$  524.3700\_16.77 min) from plasma samples were selected for method validation. The selected ions were distributed over the analysis  $m/z$  and time range. The instrumental precision was validated by analyzing five injections continuously of the same QC sample. Then five aliquots of a random sample were used to investigate the sample repeatability. The within-day stability was evaluated using five injections of the same QC sample at 0, 4, 8, 12 and 24 h. The results (RSD%) of the retention times were all not more than 5% and the intensities were not more than 10%. The method validation results confirmed the reliability of the method.
