# Supplementary material for: Metabolomics Strategy Using High Resolution Mass Spectrometry Reveals Novel Biomarkers and Pain-Relief Effect of Traditional Chinese Medicine Prescription Wu-Zhu-Yu Decoction Acting on Headache Modelling Rats
Source: MDPI journal article supplement (doi:10.3390/molecules22122110), 2017-12-18
Supplement: s1 [file s1]

**Table S1** Comparison of the times of head-scratching of the rats (n=15) in 2 h.

| Groups          | Times (mean $\pm$ SD) | <i>p</i>           |
|-----------------|-----------------------|--------------------|
| A Control       | 3.8 $\pm$ 5.5         | ---                |
| B Model         | 465.5 $\pm$ 400.1 **  | 0.000 <sup>a</sup> |
| C WZY Decoction | 216.7 $\pm$ 119.7 **  | 0.000 <sup>b</sup> |
| D Flunarizine   | 220.3 $\pm$ 183.8 **  | 0.000 <sup>b</sup> |

a: compared to group A; b: compared to group B; \*\*p<0.01.

**Table S2** The database information of the potential biomarkers and their trends in headache rat brain tissue.

| NO | Metabolite                              | Formula                                                                       | HMDB      | METLIN | KEGG   | Trend in Model |
|----|-----------------------------------------|-------------------------------------------------------------------------------|-----------|--------|--------|----------------|
| 1  | Glycerophosphocholine (GPC)             | C <sub>8</sub> H <sub>20</sub> NO <sub>6</sub> P                              | HMDB00086 | 370    | C00670 | ↑              |
| 2  | Arginine                                | C <sub>6</sub> H <sub>14</sub> N <sub>4</sub> O <sub>2</sub>                  | HMDB00517 | 13     | C00062 | ↓              |
| 3  | Adenosine monophosphate (AMP)           | C <sub>10</sub> H <sub>14</sub> N <sub>5</sub> O <sub>7</sub> P               | HMDB03540 | 63401  | C01367 | ↑              |
| 4  | Nicotinamide adenine dinucleotide (NAD) | C <sub>21</sub> H <sub>27</sub> N <sub>7</sub> O <sub>14</sub> P <sub>2</sub> | HMDB00902 | 101    | C00003 | ↑              |
| 5  | Glutathione (GSH)                       | C <sub>10</sub> H <sub>17</sub> N <sub>3</sub> O <sub>6</sub> S               | HMDB00125 | 44     | C00051 | ↑              |
| 6  | Oxidized glutathione (GSSG)             | C <sub>20</sub> H <sub>32</sub> N <sub>6</sub> O <sub>12</sub> S <sub>2</sub> | HMDB03337 | 45     | C00127 | ↑              |
| 7  | Adenine                                 | C <sub>5</sub> H <sub>5</sub> N <sub>5</sub>                                  | HMDB00034 | 85     | C00147 | ↑              |
| 8  | Adenosine                               | C <sub>10</sub> H <sub>13</sub> N <sub>5</sub> O <sub>4</sub>                 | HMDB00050 | 86     | C00212 | ↑              |
| 9  | Valerolactam                            | C <sub>5</sub> H <sub>9</sub> NO                                              | HMDB11749 | 62467  | -      | ↑              |
| 10 | Butyrylcarnitine                        | C <sub>11</sub> H <sub>21</sub> NO <sub>4</sub>                               | HMDB02013 | 964    | C02862 | ↑              |
| 11 | Caprolactam                             | C <sub>6</sub> H <sub>11</sub> NO                                             | -         | 44753  | C06593 | ↑              |
| 12 | Cholecalciferol (Vitamin D3)            | C <sub>27</sub> H <sub>44</sub> O                                             | HMDB14315 | 165    | C05443 | ↓              |

**Table S3** The database information of the potential biomarkers and their trends in headache rat plasma.

| NO | Metabolite                          | Formula                                                      | HMDB      | METLIN | KEGG   | Trend in Model |
|----|-------------------------------------|--------------------------------------------------------------|-----------|--------|--------|----------------|
| 1  | Arginine                            | C <sub>6</sub> H <sub>14</sub> N <sub>4</sub> O <sub>2</sub> | HMDB00517 | 13     | C00062 | ↓              |
| 2  | Carnitine                           | C <sub>7</sub> H <sub>15</sub> NO <sub>3</sub>               | HMDB00062 | 52     | C00318 | ↓              |
| 3  | 5-Hydroxyindoleacetic acid (5-HIAA) | C <sub>10</sub> H <sub>9</sub> NO <sub>3</sub>               | HMDB00763 | 2975   | C05635 | ↓              |
| 4  | 3-Methylindole                      | C <sub>9</sub> H <sub>9</sub> N                              | HMDB00466 | 5453   | C08313 | ↓              |
| 5  | Hydroxyindole                       | C <sub>8</sub> H <sub>7</sub> NO                             | HMDB59805 | 34514  | C02040 | ↓              |
| 6  | Indoleacetic acid (IAA)             | C <sub>10</sub> H <sub>9</sub> NO <sub>2</sub>               | HMDB00197 | 70     | C00954 | ↓              |

**Table S4** Principle metabolic pathways of the metabolites in KEGG database.

| NO | Metabolite                        | Pathways                                                                                            |
|----|-----------------------------------|-----------------------------------------------------------------------------------------------------|
| 1  | Arginine                          | Arginine and proline metabolism; Arginine biosynthesis; Aminoacyl-tRNA biosynthesis                 |
| 2  | Glutathione                       | Glutathione metabolism; Cysteine and methionine metabolism                                          |
| 3  | Oxidized glutathione              | Glutathione metabolism                                                                              |
| 4  | Indoleacetic acid                 | Tryptophan metabolism                                                                               |
| 5  | 5-Hydroxyindoleacetic acid        | Tryptophan metabolism                                                                               |
| 6  | 3-Methylindole                    | -                                                                                                   |
| 7  | Hydroxyindole                     | -                                                                                                   |
| 8  | Adenine                           | Purine metabolism                                                                                   |
| 9  | Adenosine                         | Purine metabolism; cAMP signaling pathway; Sphingolipid signaling pathway                           |
| 10 | Adenosine monophosphate           | Purine metabolism                                                                                   |
| 11 | Nicotinamide adenine dinucleotide | Nicotinate and nicotinamide metabolism; Oxidative phosphorylation; Vitamin digestion and absorption |
| 12 | Carnitine                         | Lysine degradation; Bile secretion                                                                  |
| 13 | Butyrylcarnitine                  | -                                                                                                   |
| 14 | Glycerophosphocholine             | Glycerophospholipid metabolism; Ether lipid metabolism                                              |
| 15 | Caprolactam                       | Caprolactam degradation                                                                             |
| 16 | Valerolactam                      | Valerolactam degradation                                                                            |
| 17 | Cholecalciferol                   | Vitamin digestion and absorption                                                                    |
