# Supplementary material for: Metabolomics Strategy Using High Resolution Mass Spectrometry Reveals Novel Biomarkers and Pain-Relief Effect of Traditional Chinese Medicine Prescription Wu-Zhu-Yu Decoction Acting on Headache Modelling Rats
Source: Molecules. 2017 Dec 18;22(12):2110. doi: 10.3390/molecules22122110 (PMC6149820; doi:10.3390/molecules22122110)
Supplement: Supplementary file 1 [file molecules-22-02110-s001.zip]

Archive with 6 entries (6 files):
- Figure S1.tif
- Figure S2.tif
- Figure S3.tif
- Figure S4.tif
- Supplementary Materials - Method Validation.pdf
- Tables S1-4.pdf
